# Supplementary material
Source: PubMed Central journal article supplement (PMC4329729)
Supplement: NIHMS654893-supplement-3.pdf [file NIHMS654893-supplement-3.pdf]

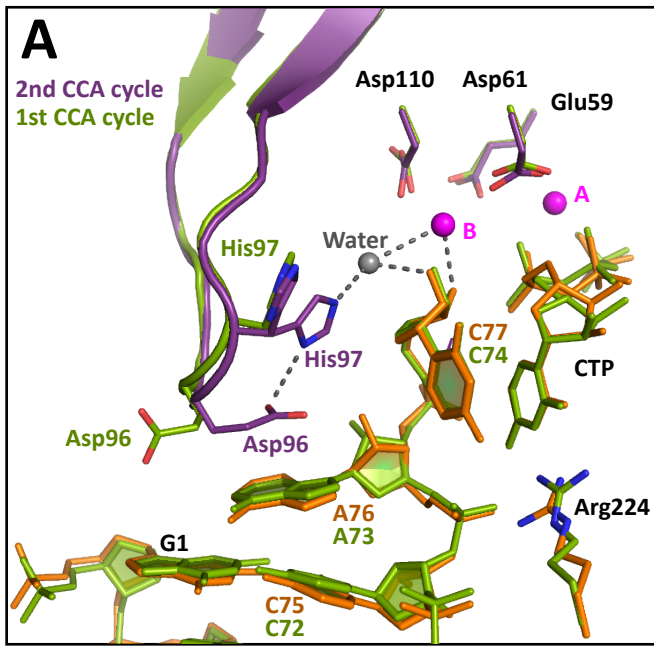

miniR-C+CTP (1st CCA cycle)    miniUR-CCAC+CTP (2nd CCA cycle)

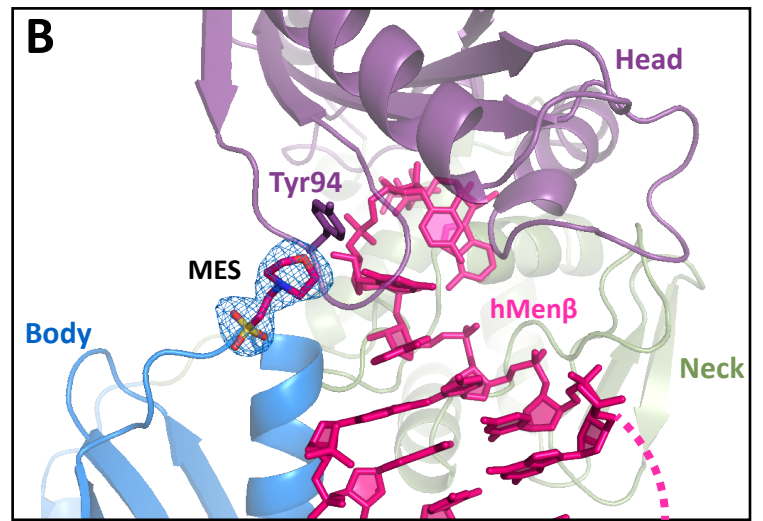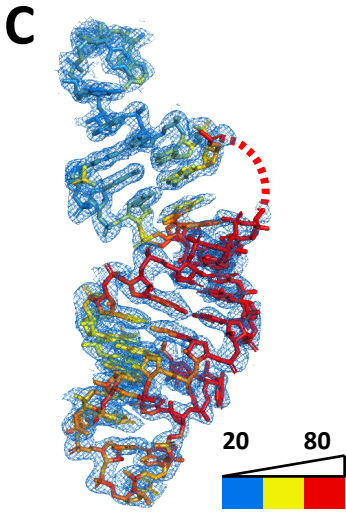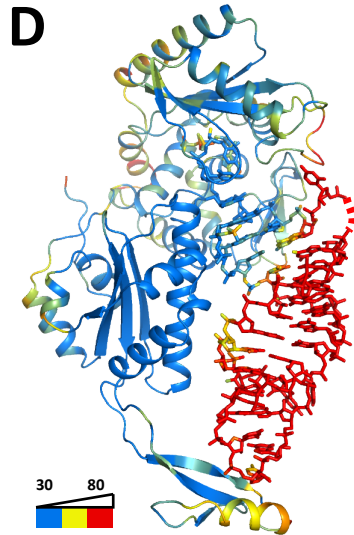

miniUR-CCACC+AMPcPP

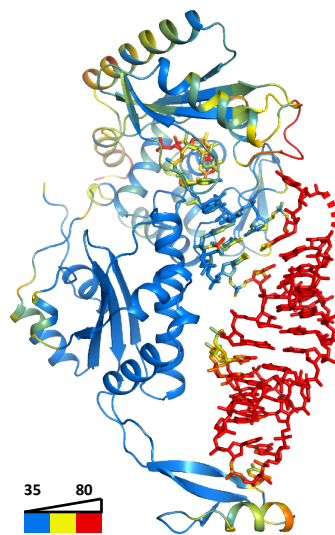

miniUR-CCACC+CTP (noncognate CTP)

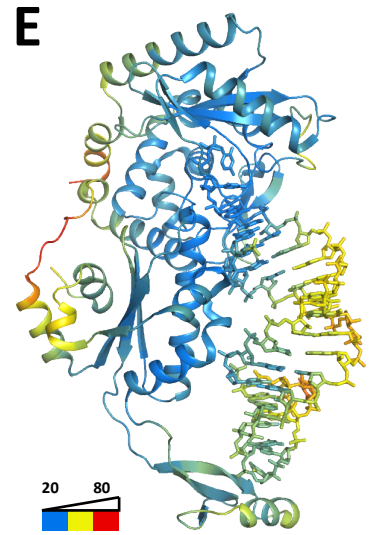

miniR-CC+AMPcPP 1st CCA cycle (PDB code 2DRA)
