# Supplementary material
Source: PubMed Central journal article supplement (PMC4329729)

**A**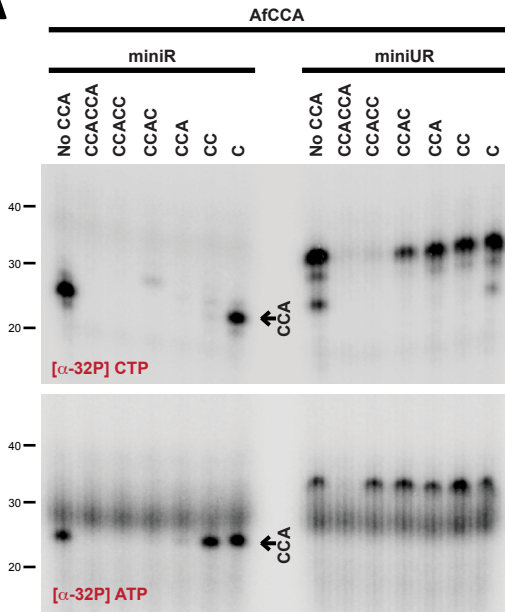**B**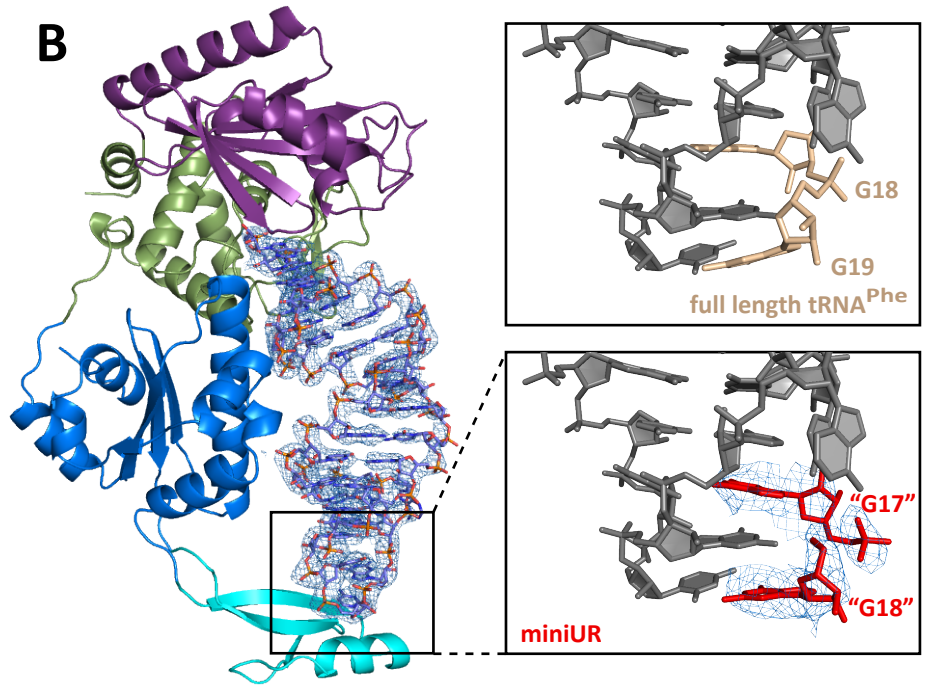**C**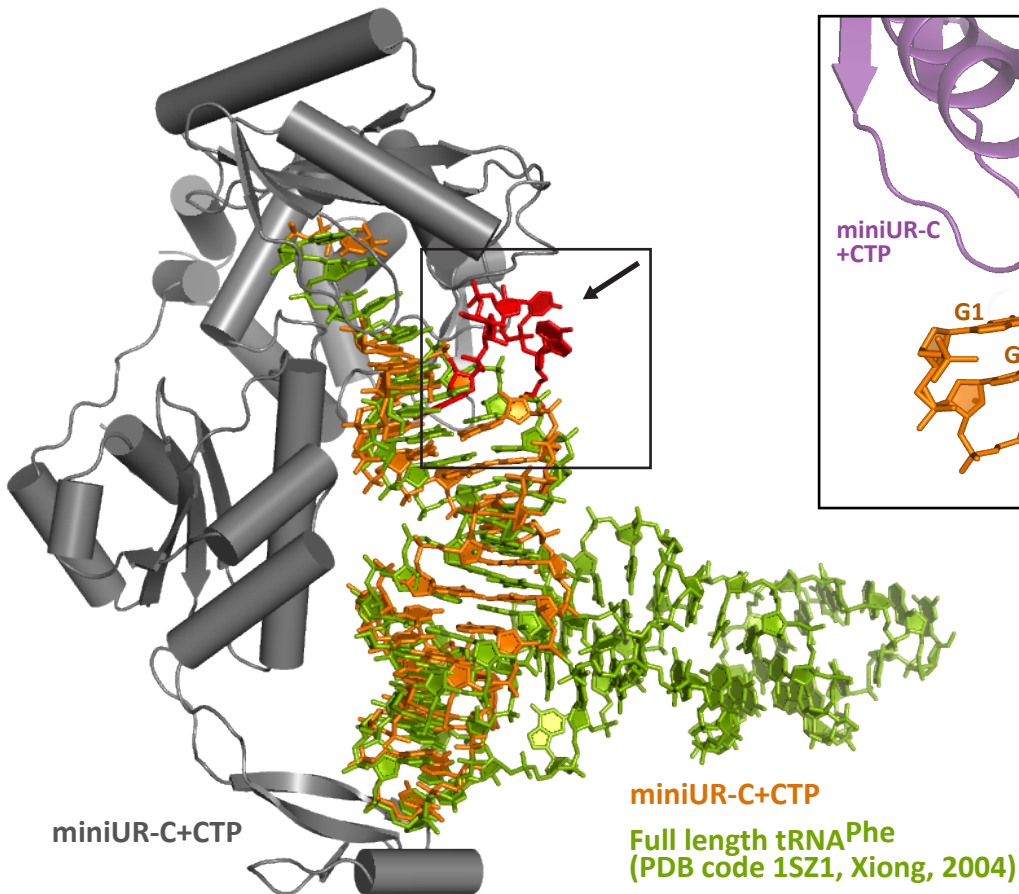**D**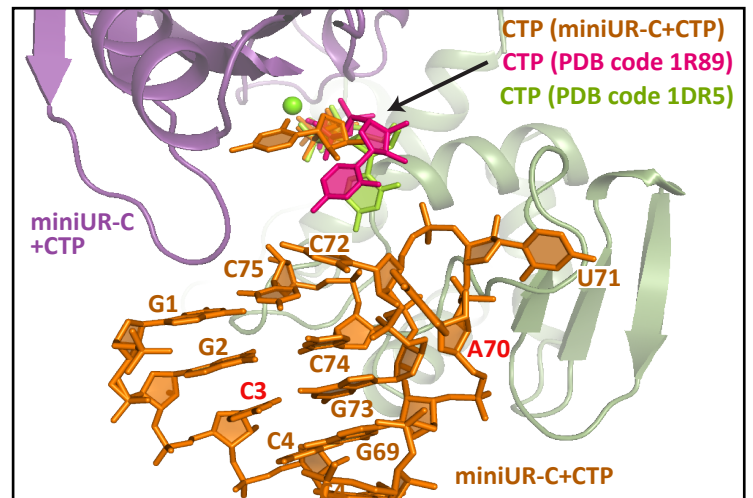

Supplement: NIHMS654893-supplement-1.pdf [file NIHMS654893-supplement-1.pdf]

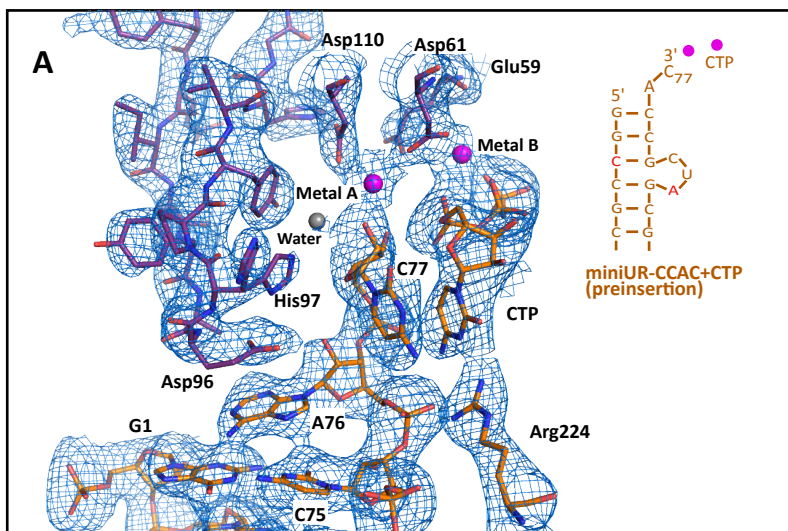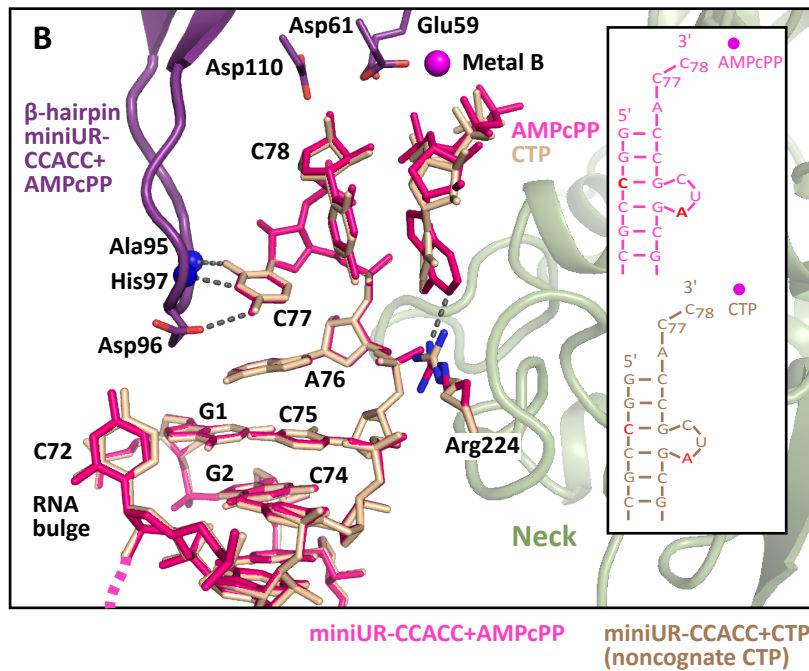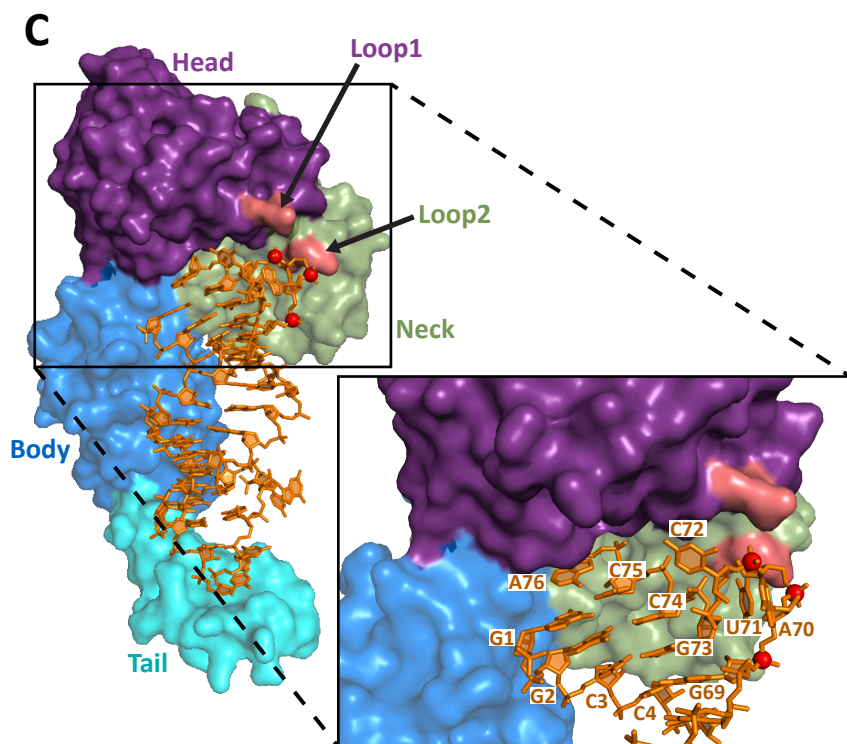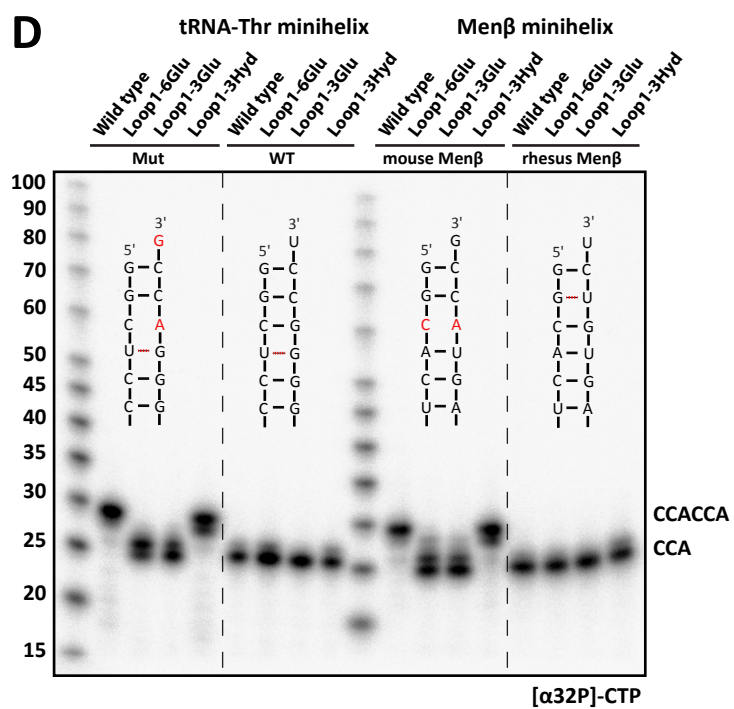

Supplement: NIHMS654893-supplement-2.pdf [file NIHMS654893-supplement-2.pdf]

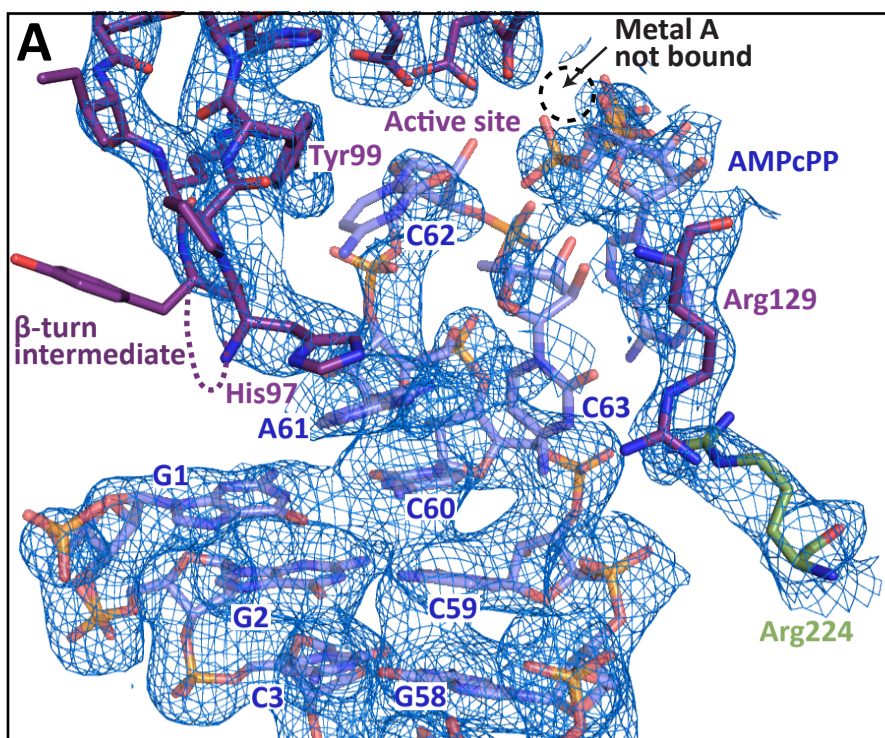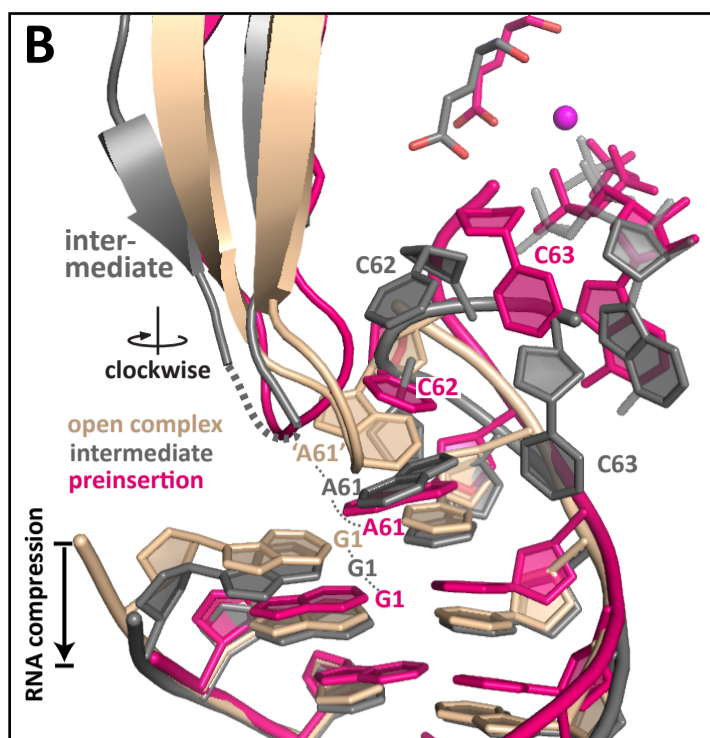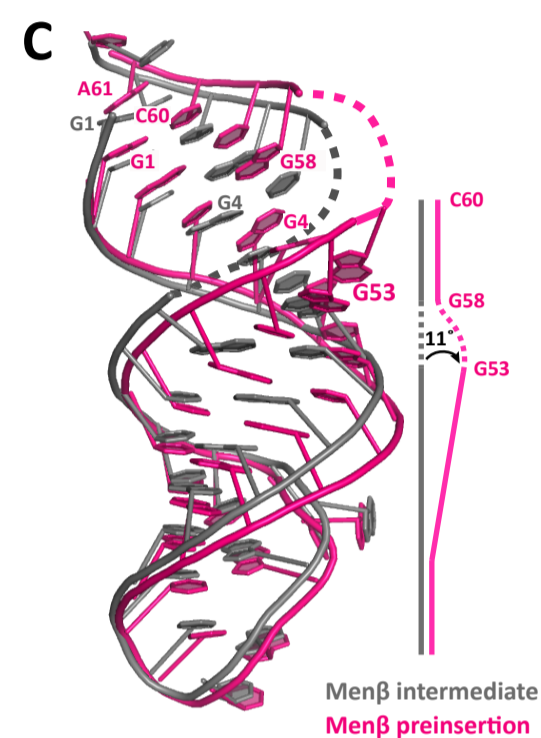

**D** Archaeal CCA-adding enzyme

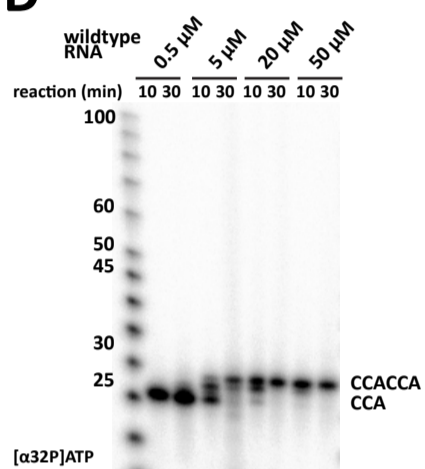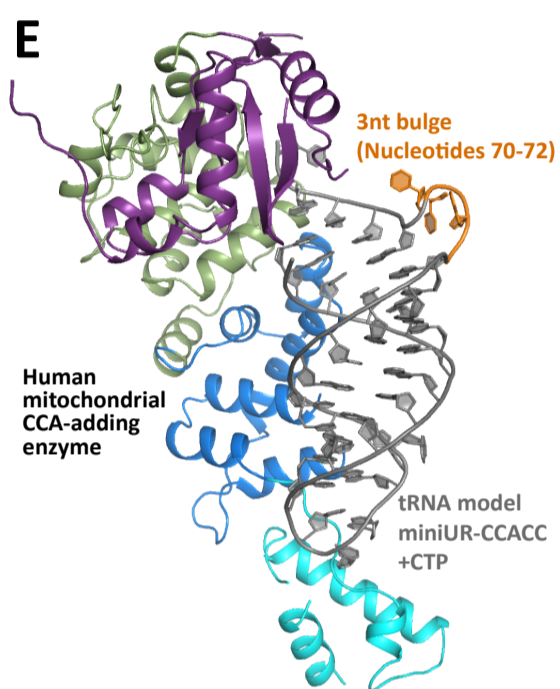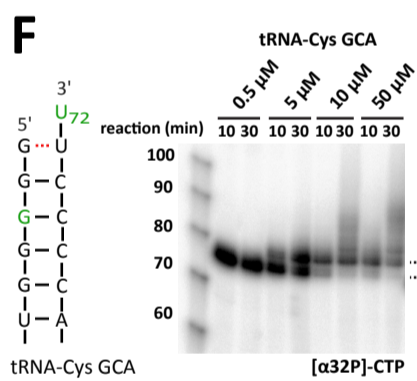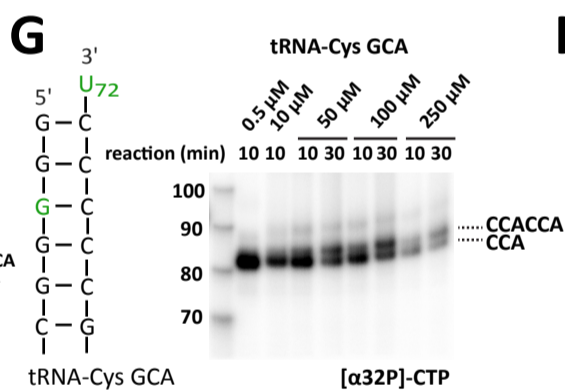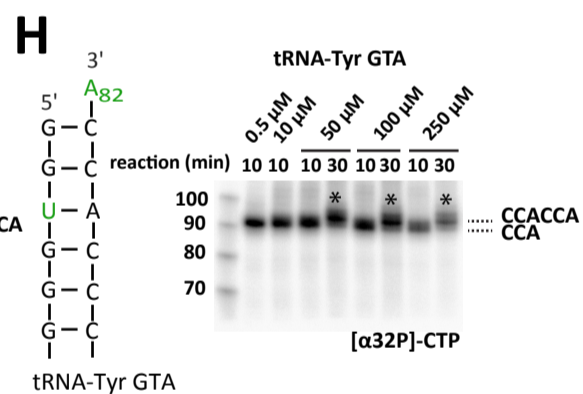

Supplement: NIHMS654893-supplement-5.pdf [file NIHMS654893-supplement-5.pdf]

**A****RMSD deviation from miniUR-CCAC+CTP (Figure 2)**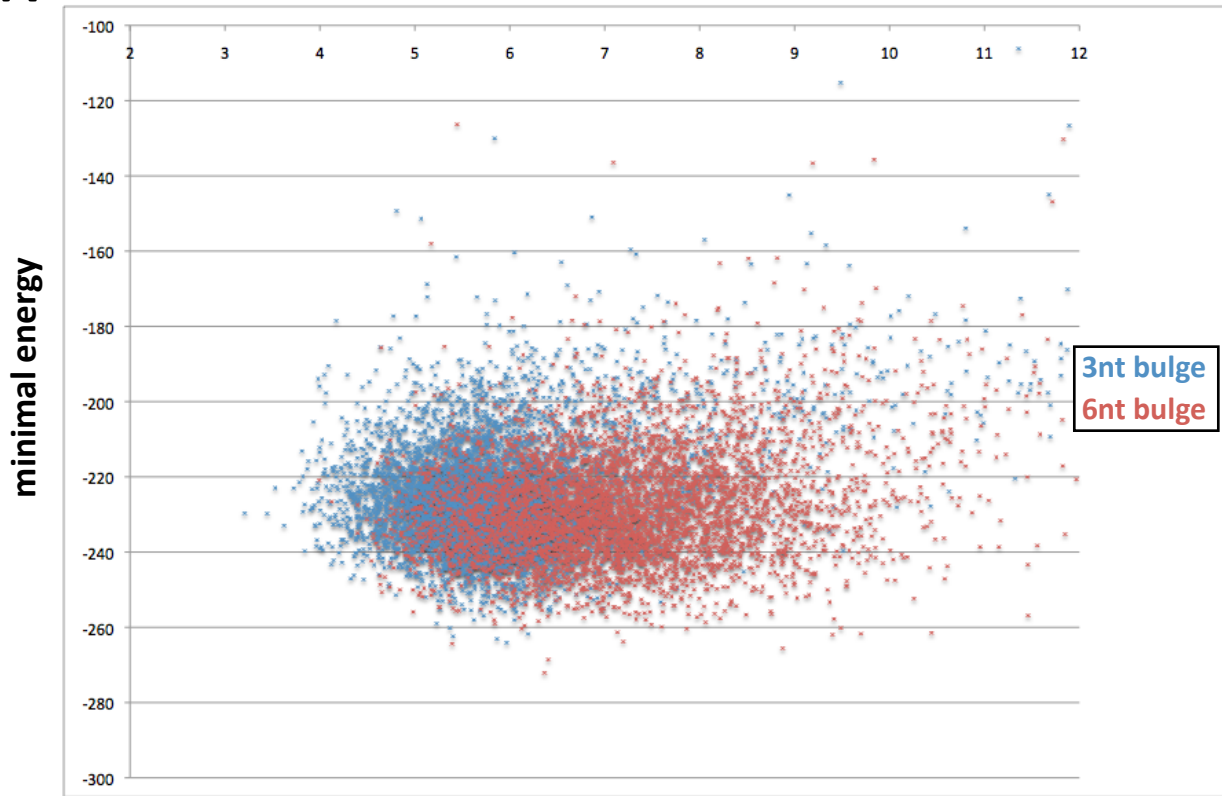**B**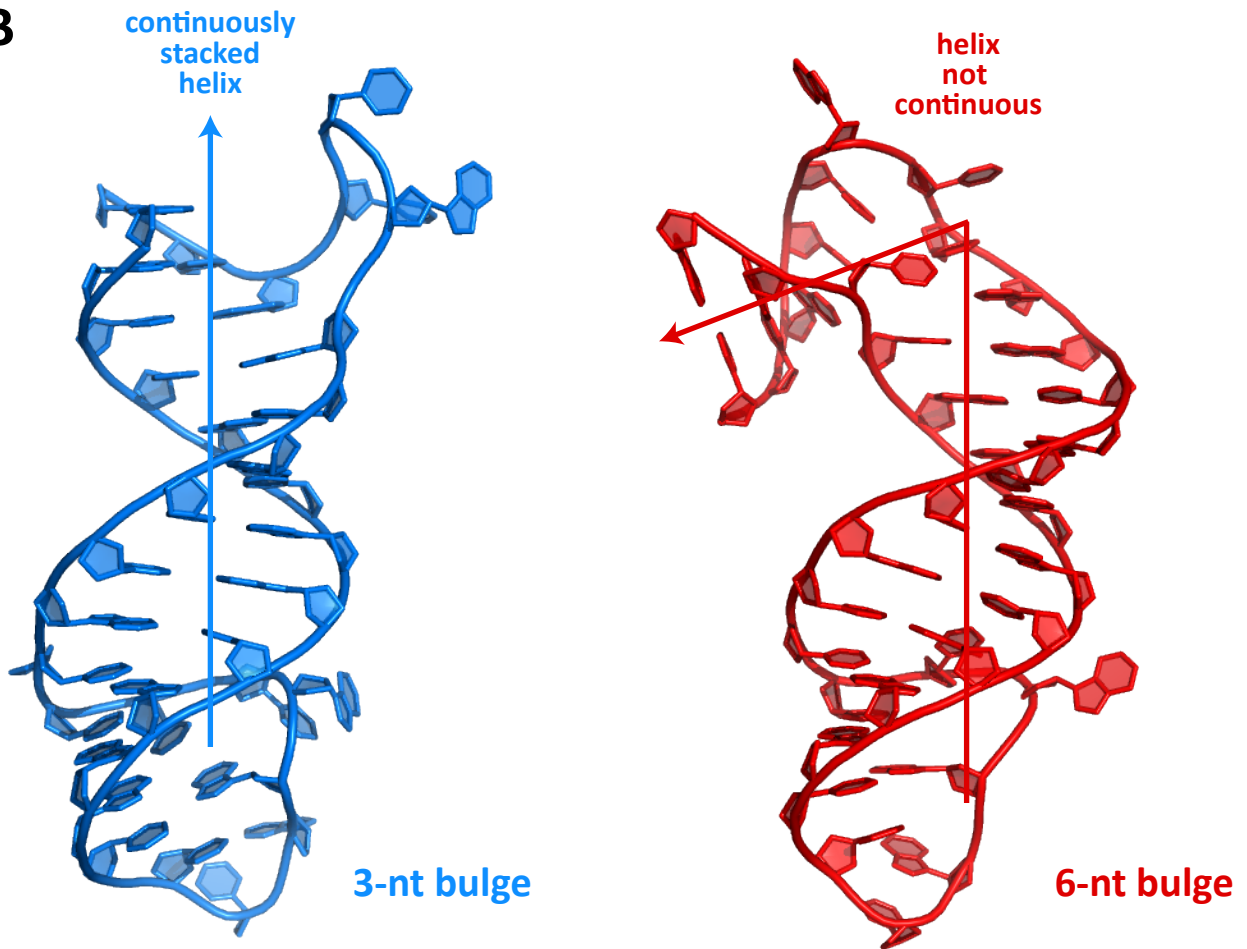

Supplement: NIHMS654893-supplement-6.pdf [file NIHMS654893-supplement-6.pdf]
